# Supplementary material for: Usefulness of a Hepatitis B Surface Antigen-Based Model for the Prediction of Functional Cure in Patients with Chronic Hepatitis B Virus Infection Treated with Nucleos(t)ide Analogues: A Real-World Study
Source: MDPI journal article supplement (doi:10.3390/jcm10153308), 2021-07-27
Supplement: s1 [file s1]

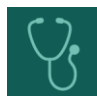

Supplementary Materials

# Usefulness of a Hepatitis B Surface Antigen-Based Model for the Prediction of Functional Cure in Patients with Chronic Hepatitis B Virus Infection treated with Nucleos(t)ide Analogues: a Real-World Study

Gian Paolo Caviglia, Yulia Troshina, Enrico Garro, Marcantonio Gesualdo, Serena Aneli, Giovanni Birolo, Fabrizia Pittaluga, Rossana Cavallo, Giorgio Maria Saracco and Alessia Ciano

**Table S1.** HBsAg values from baseline to the last FU in the overall population and according to functional cure.

| Timepoint | Overall Population<br>HBsAg (IU/mL) | No HBsAg Loss<br>HBsAg (IU/mL) | Functional Cure<br>HBsAg (IU/mL) | <i>p</i> value |
|-----------|-------------------------------------|--------------------------------|----------------------------------|----------------|
| T0        | 1765 (699–7584)                     | 2236 (812–8911)                | 13 (3–95)                        | <0.001         |
| T1        | 1896 (711–6577)                     | 2357 (793–6784)                | 6 (1–39)                         | <0.001         |
| T2        | 1744 (532–6011)                     | 2362 (866–6582)                | 4 (1–13)                         | <0.001         |
| Last-FU   | 1000 (98–3542)                      | 1472 (428–3880)                | 0 (0–0)                          | <0.001         |

*p* values were calculated by the Mann-Whitney test. Data are reported as the median and interquartile range. Abbreviations—follow-up (FU), hepatitis B surface antigen (HBsAg), timepoint (T).
